# Supplementary material for: A genome-wide Asian genetic map and ethnic comparison: The GENDISCAN study
Source: PubMed Central journal article supplement (PMC2612022; doi:10.1186/1471-2164-9-554), 2008-11-25

# Chromosome 1

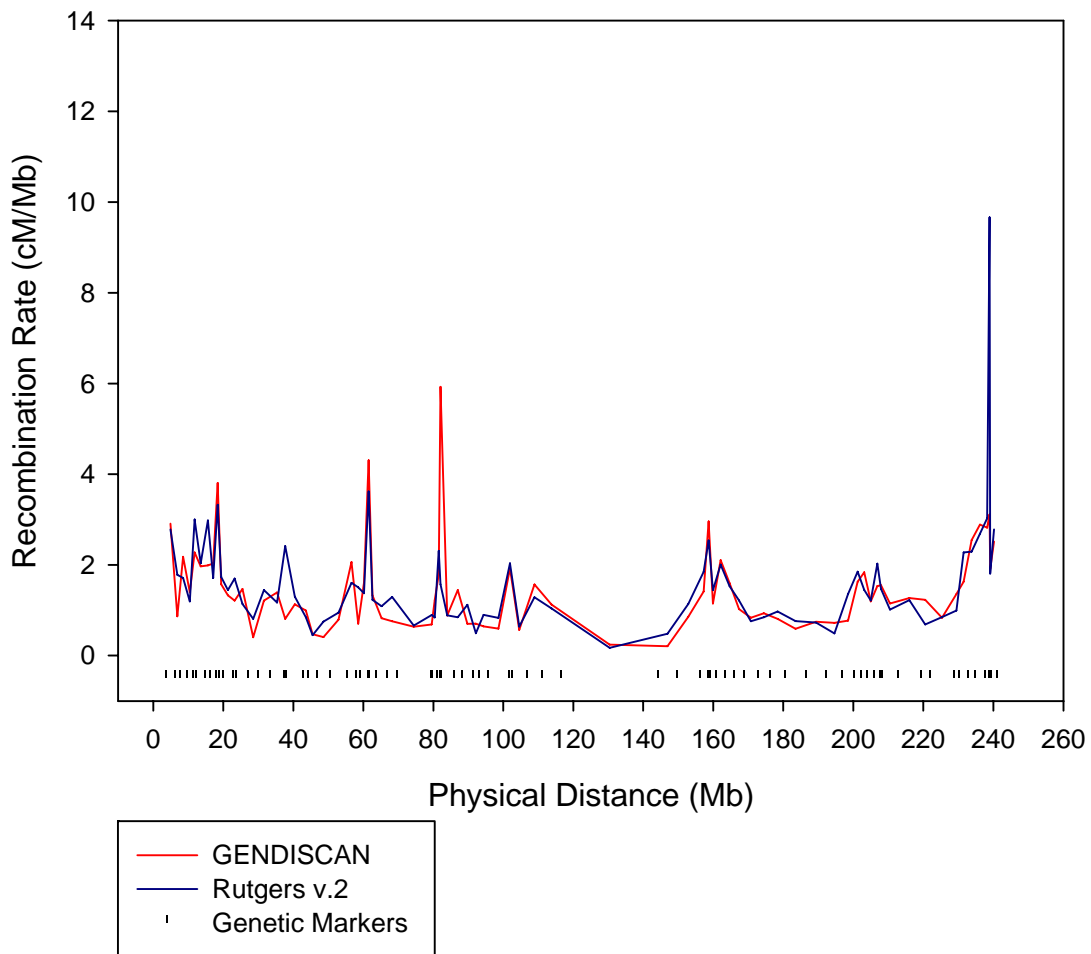

## Chromosome 2

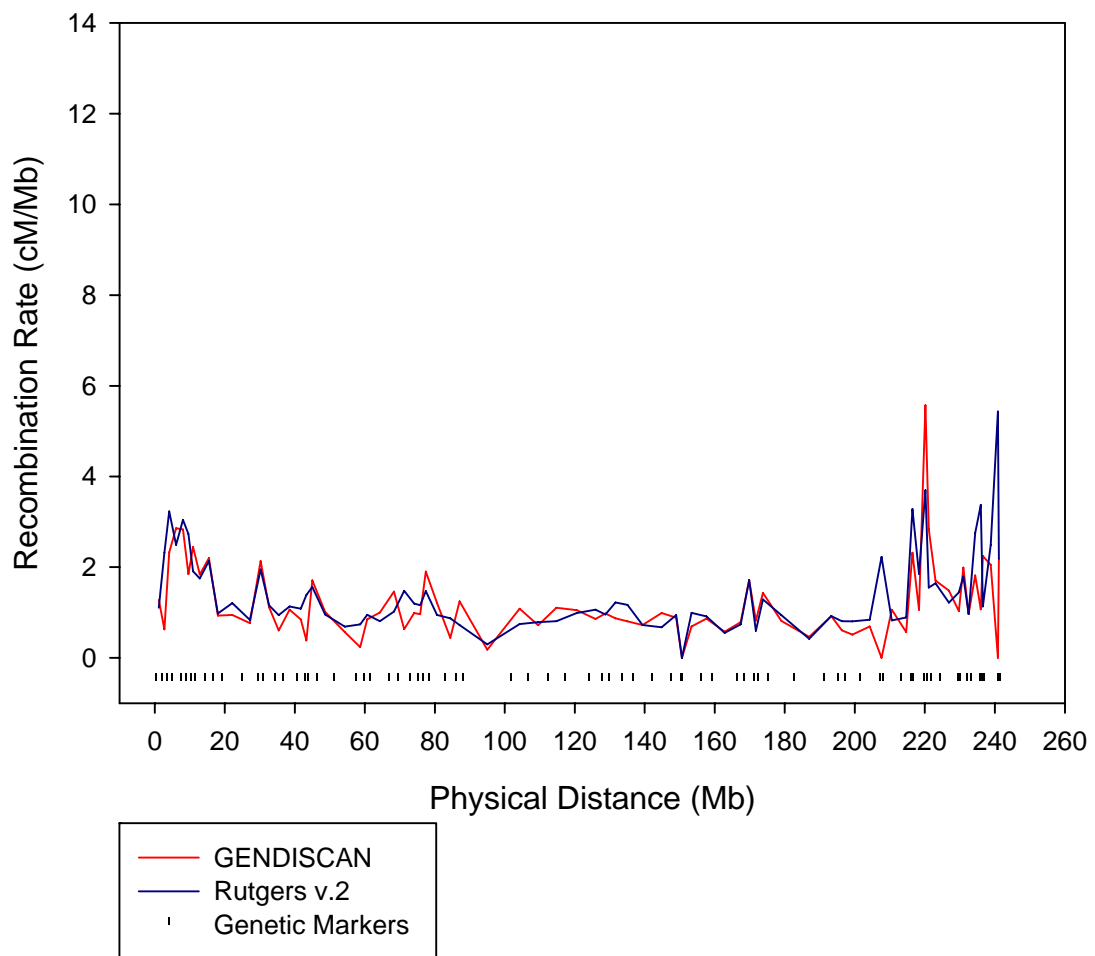

### Chromosome 3

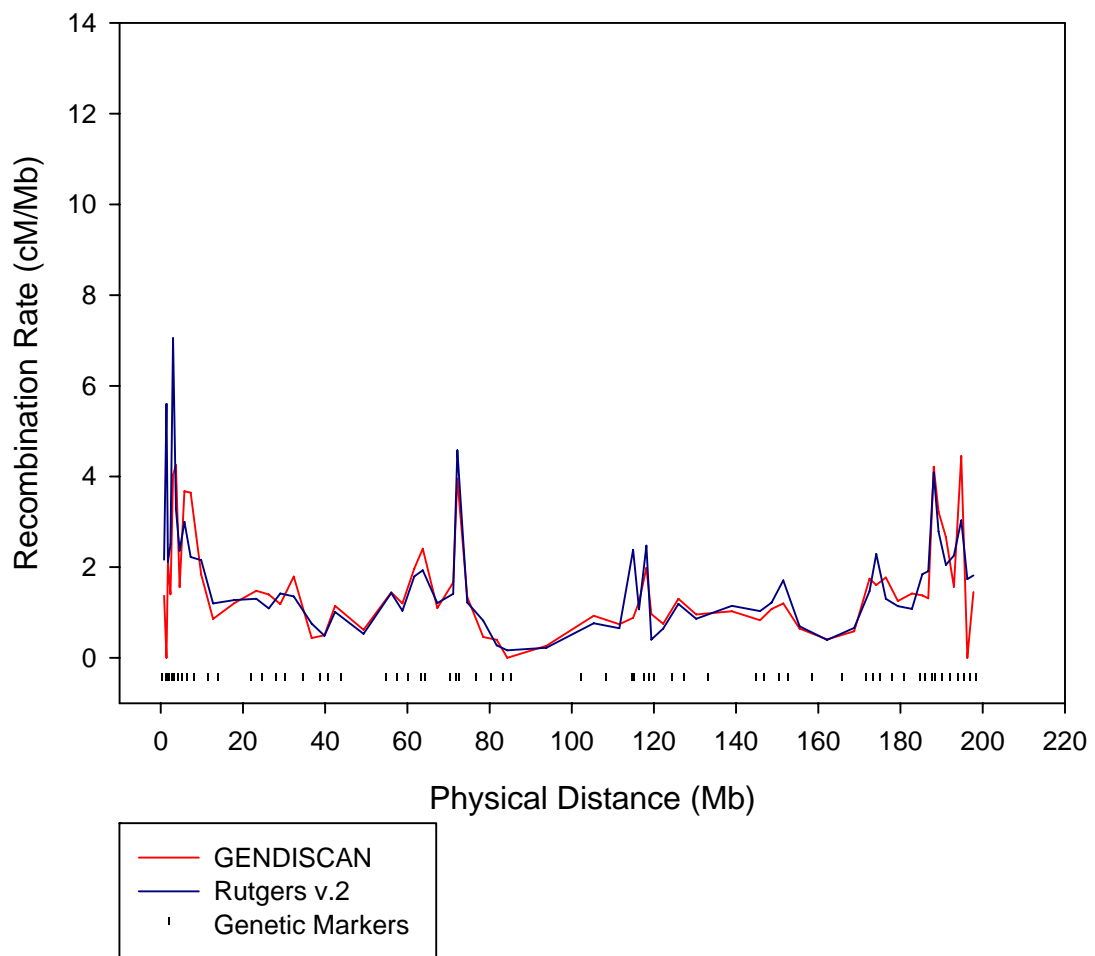

# Chromosome 4

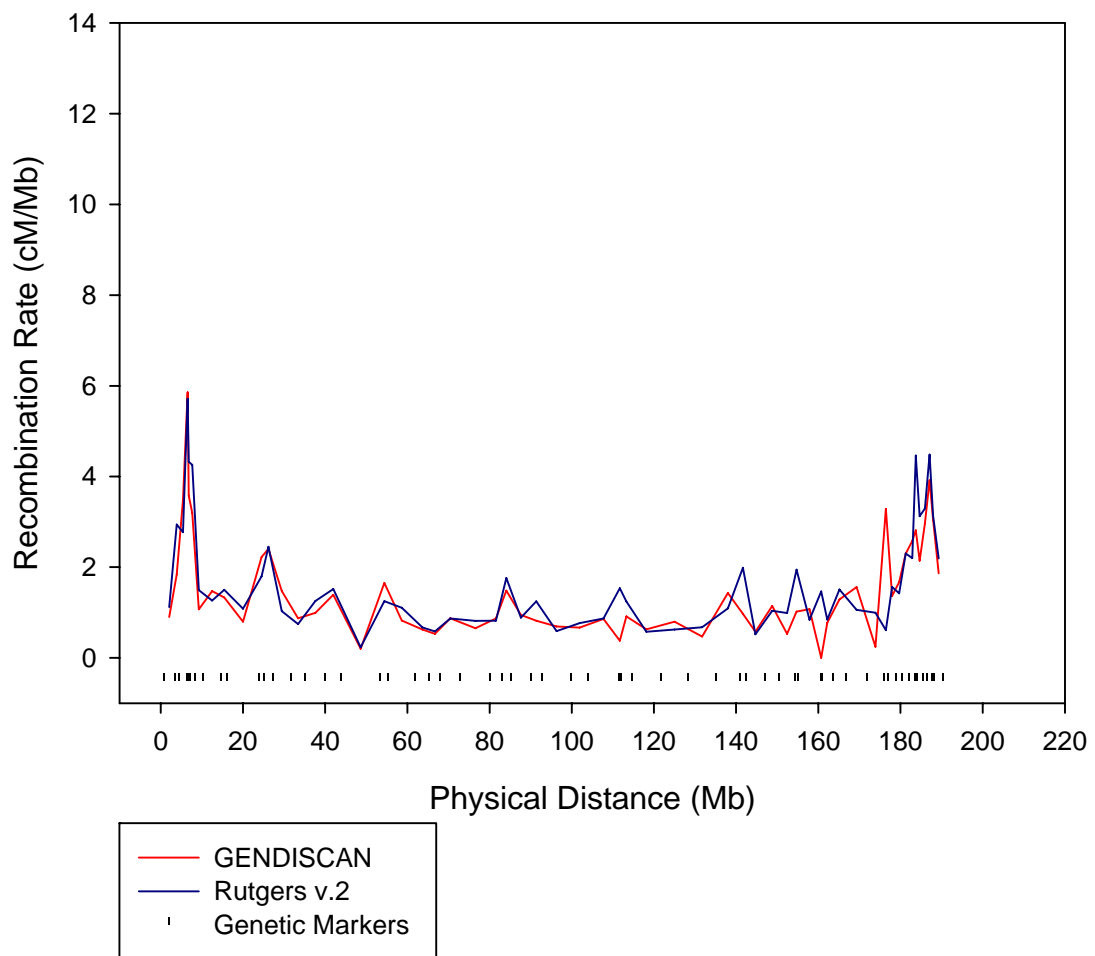

# Chromosome 5

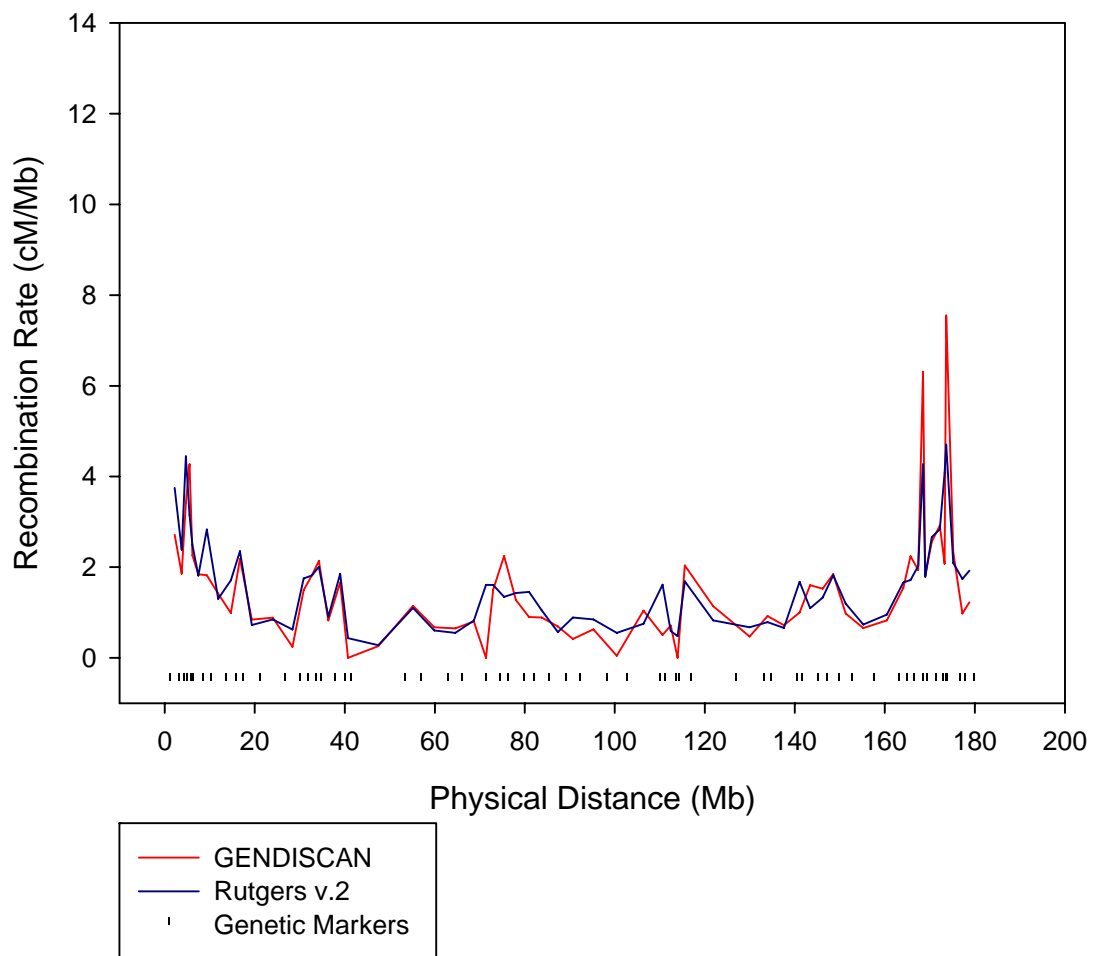

# Chromosome 6

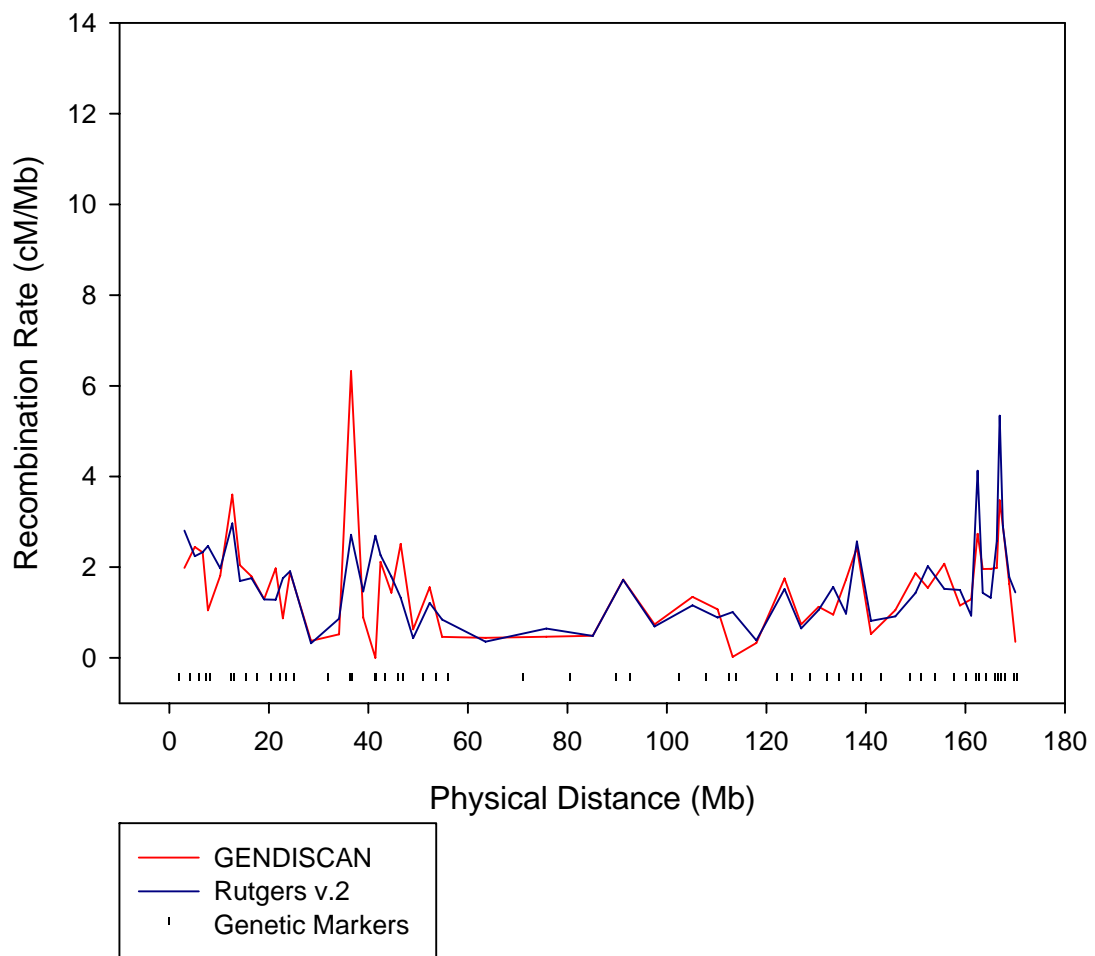

# Chromosome 7

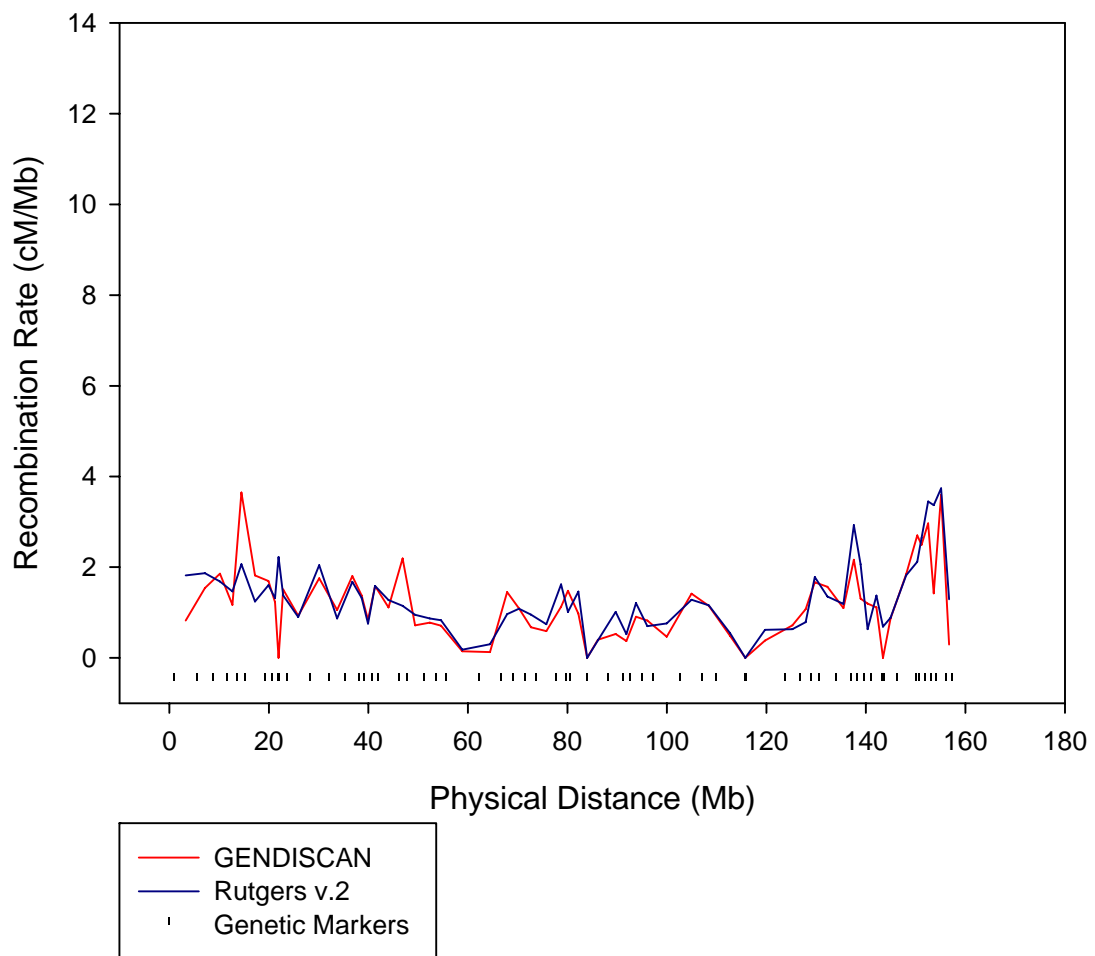

# Chromosome 8

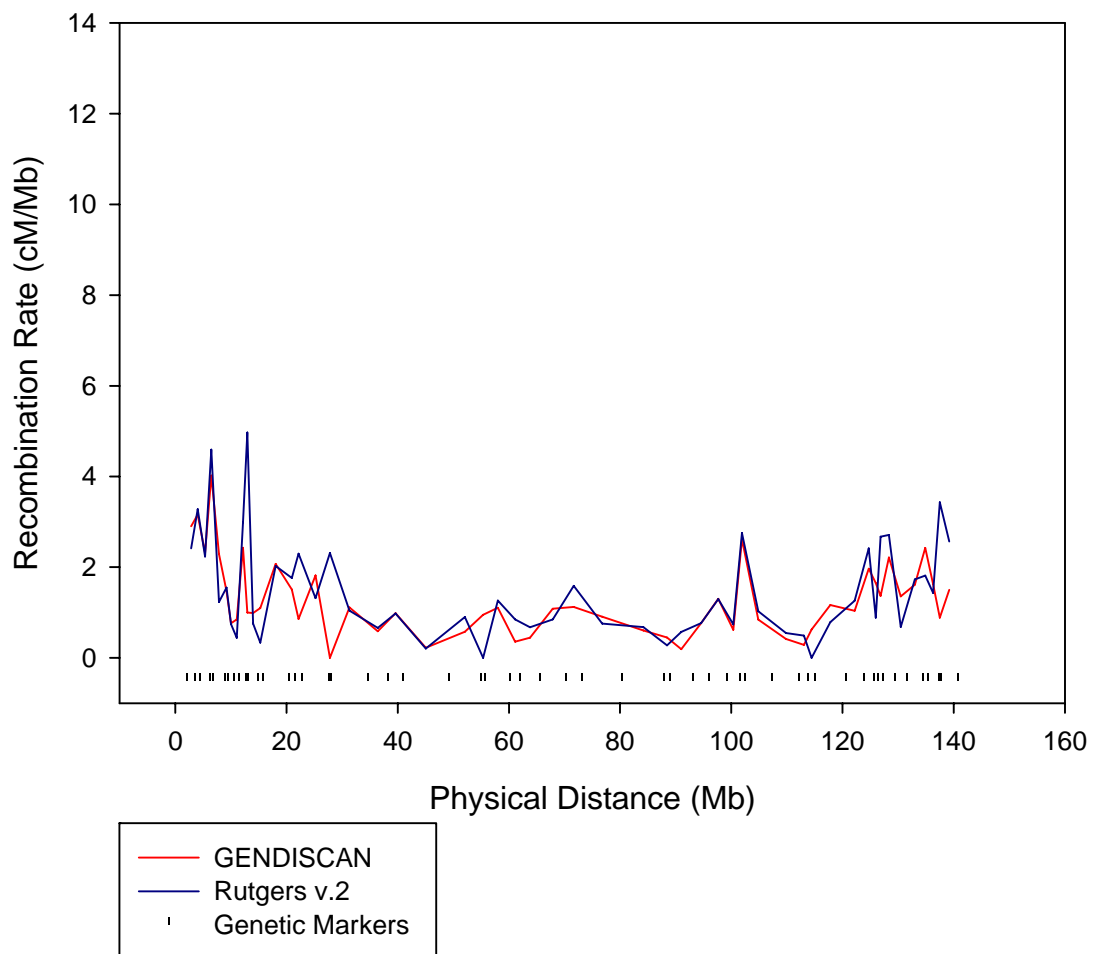



# Chromosome 9

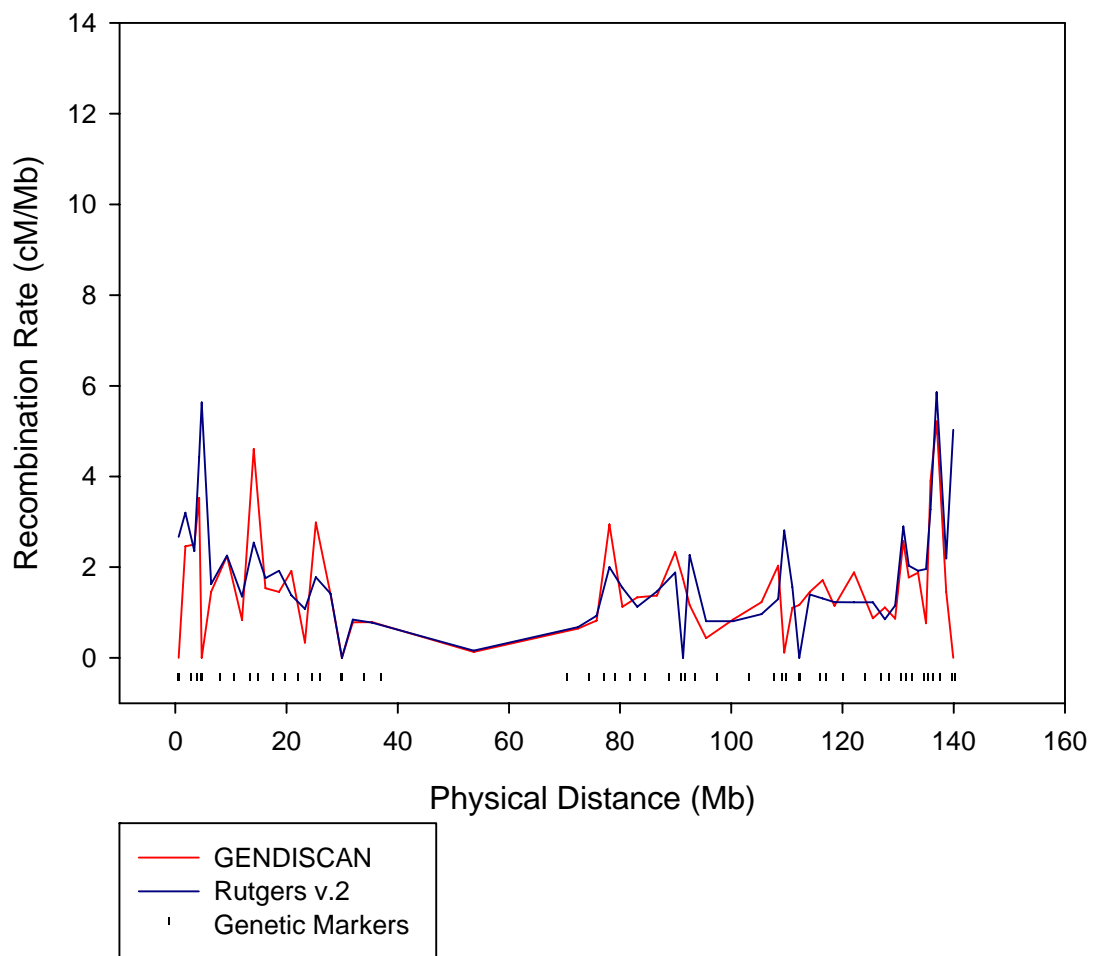

# Chromosome 10

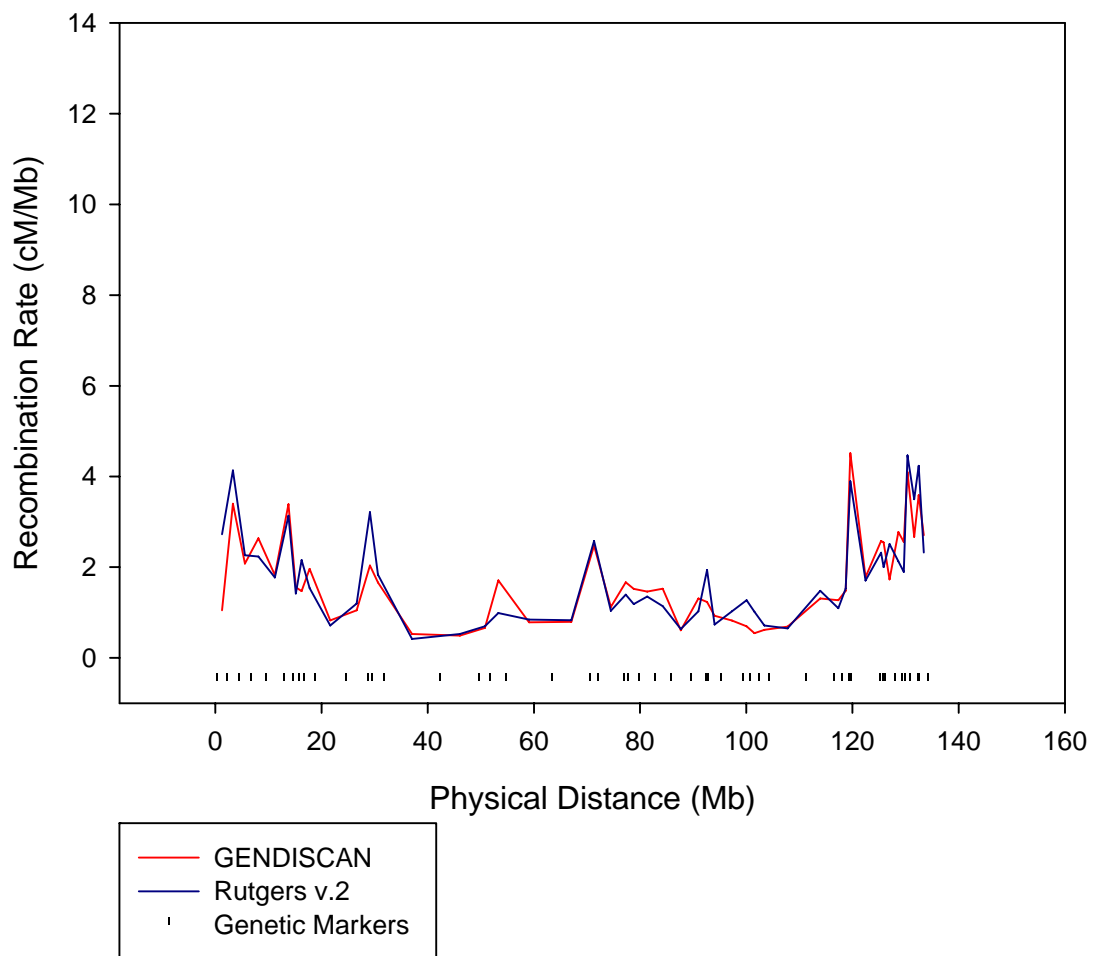

# Chromosome 11

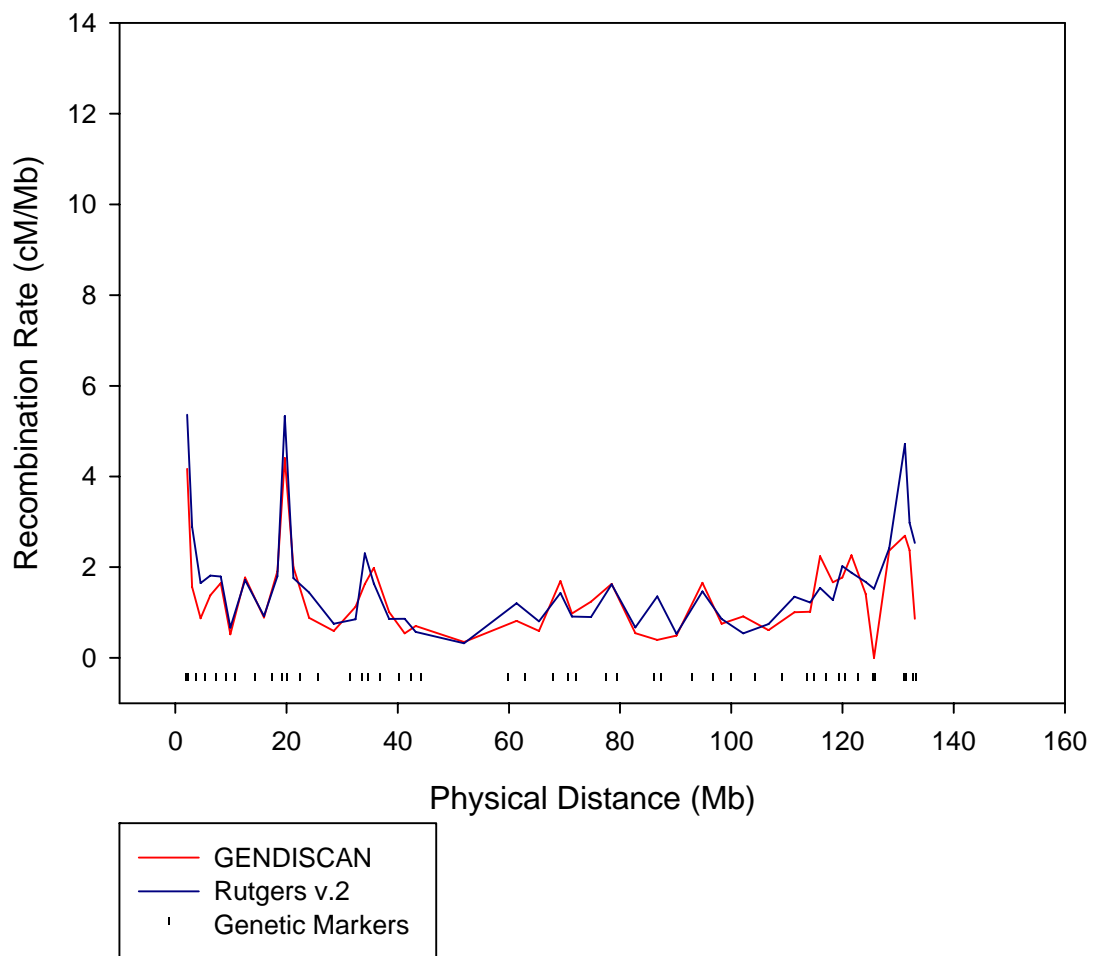

# Chromosome 12

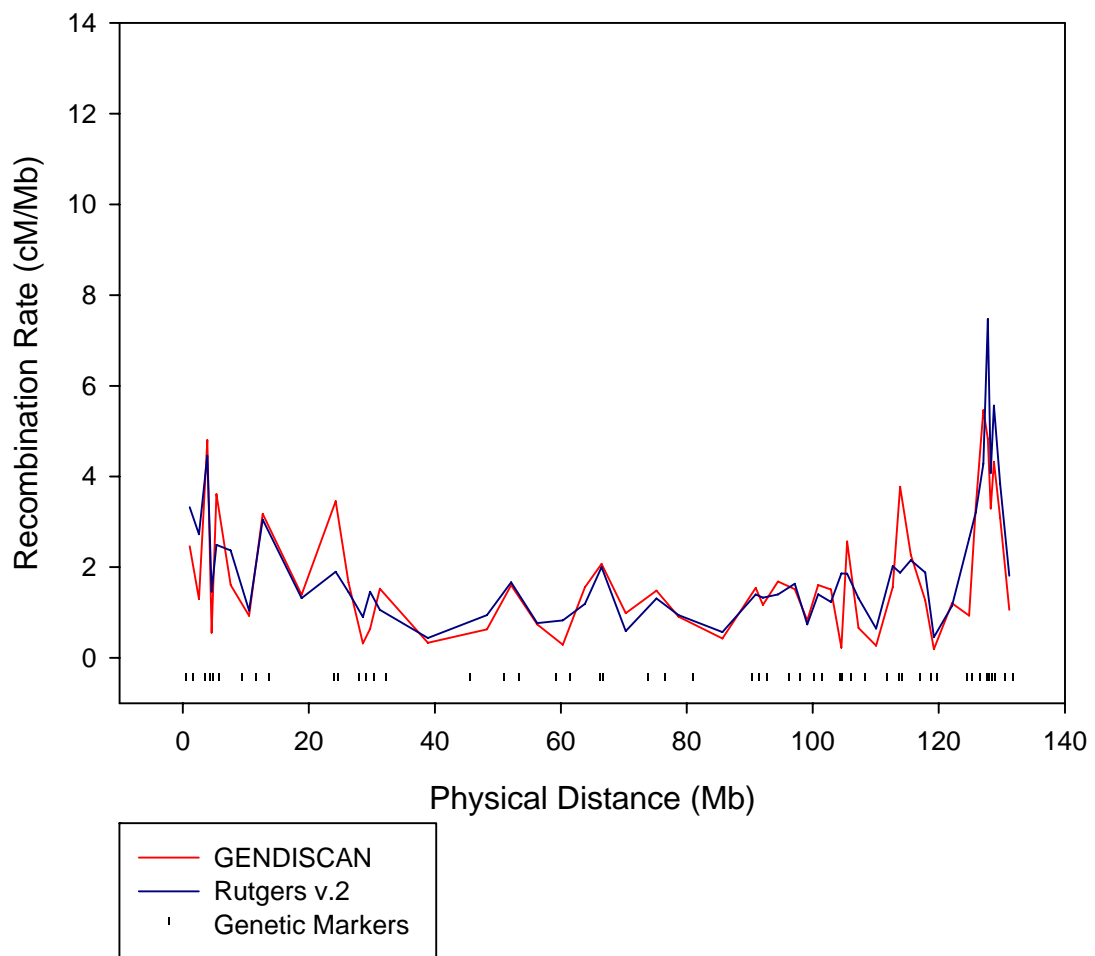

### Chromosome 13

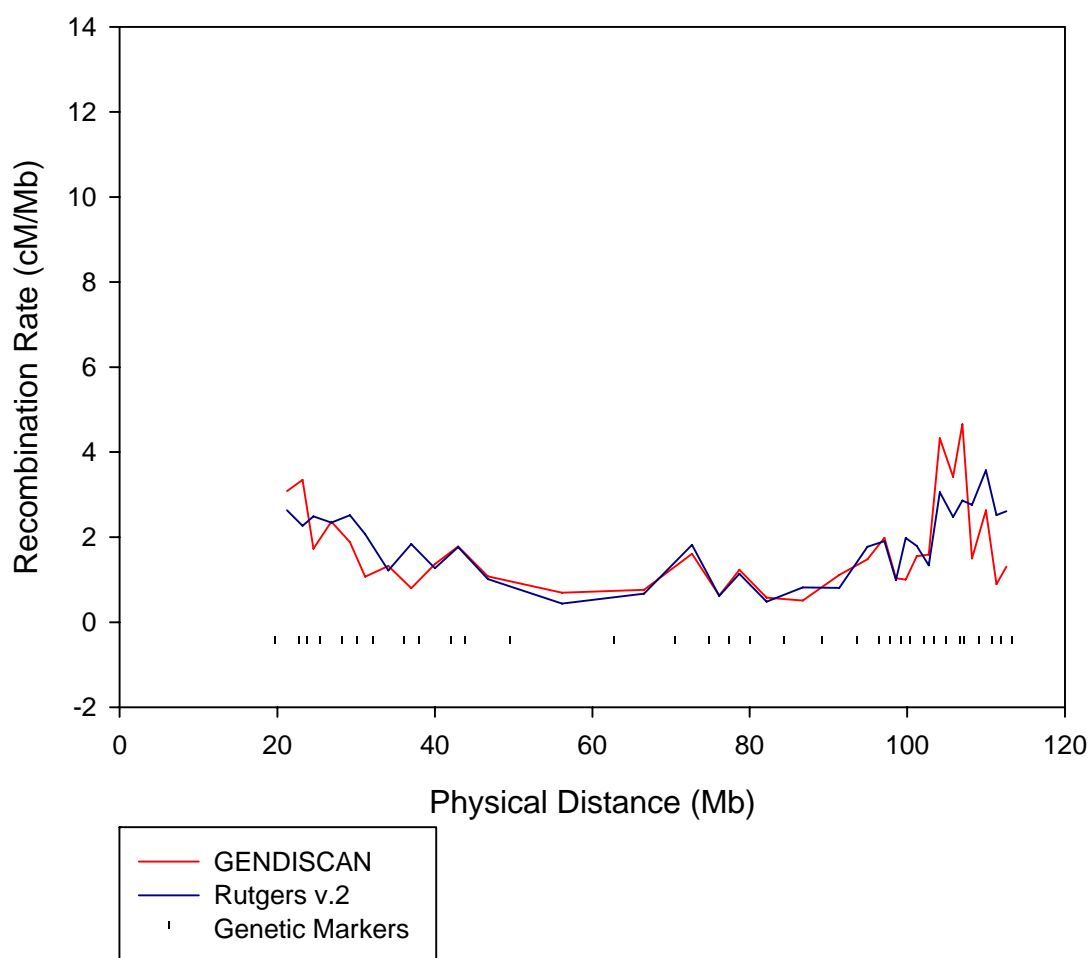

# Chromosome 14

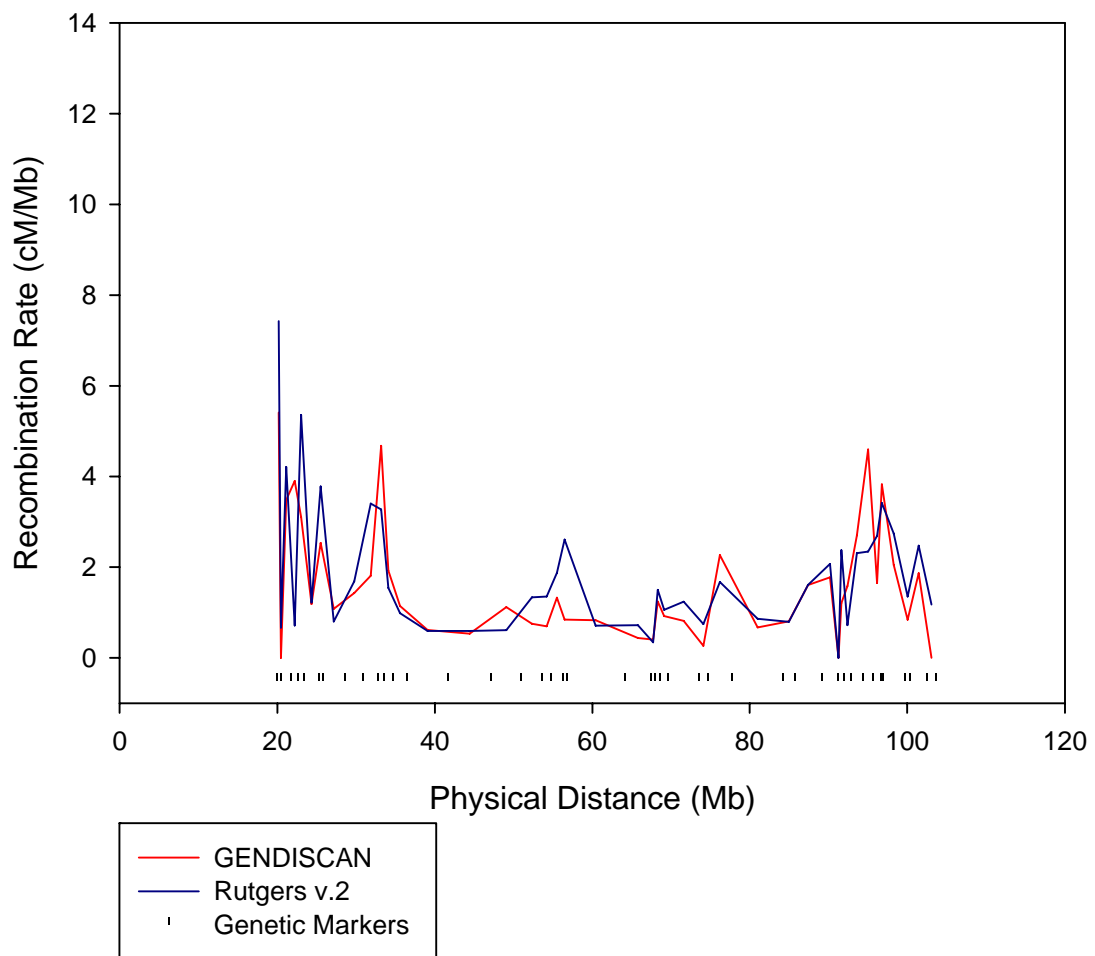

# Chromosome 15

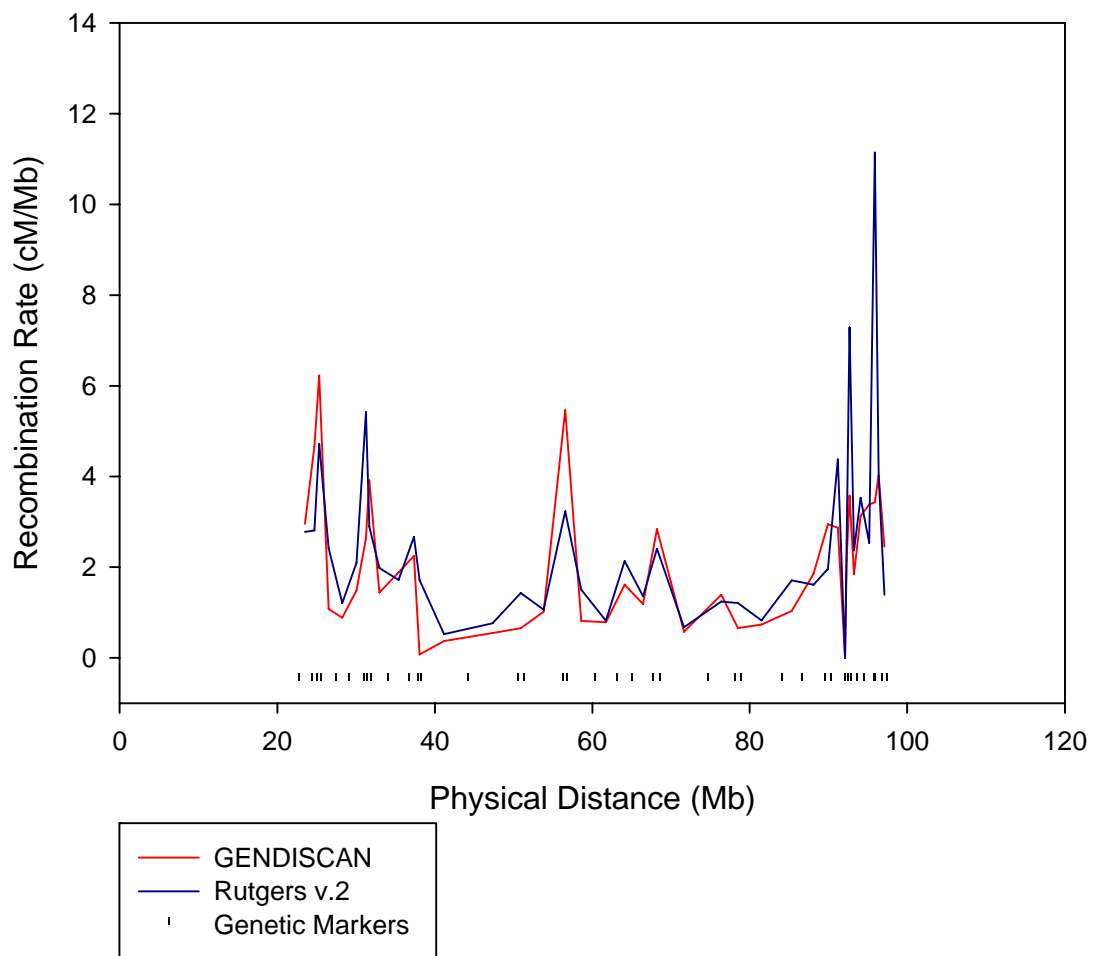

# Chromosome 16

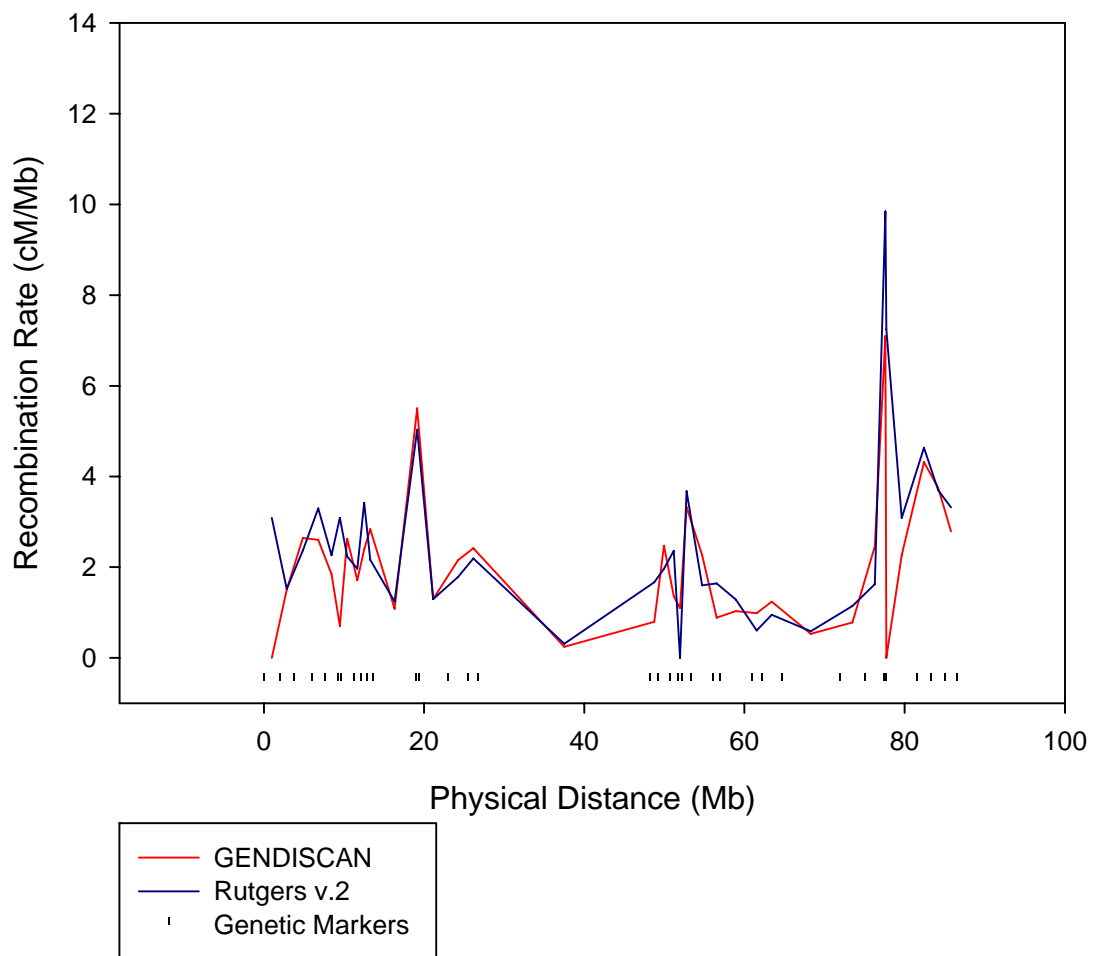



# Chromosome 17

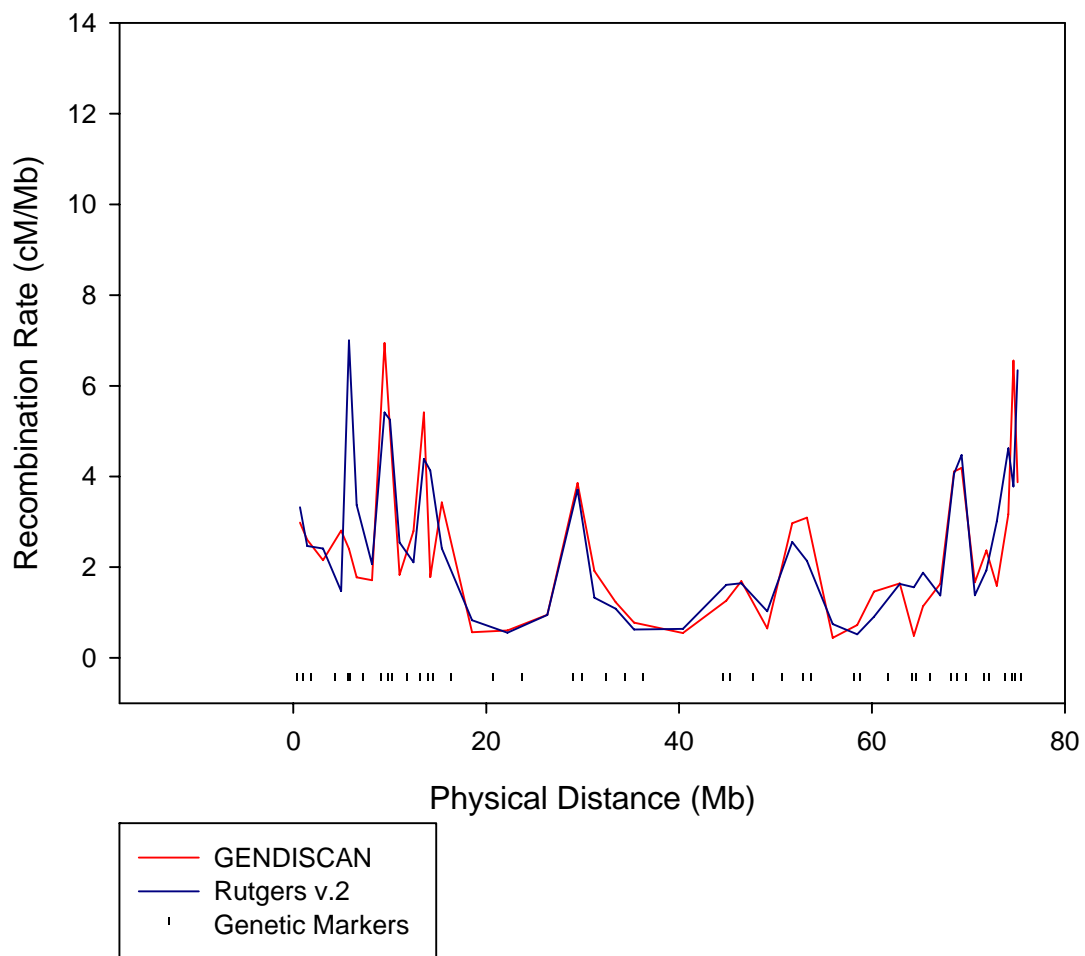

# Chromosome 18

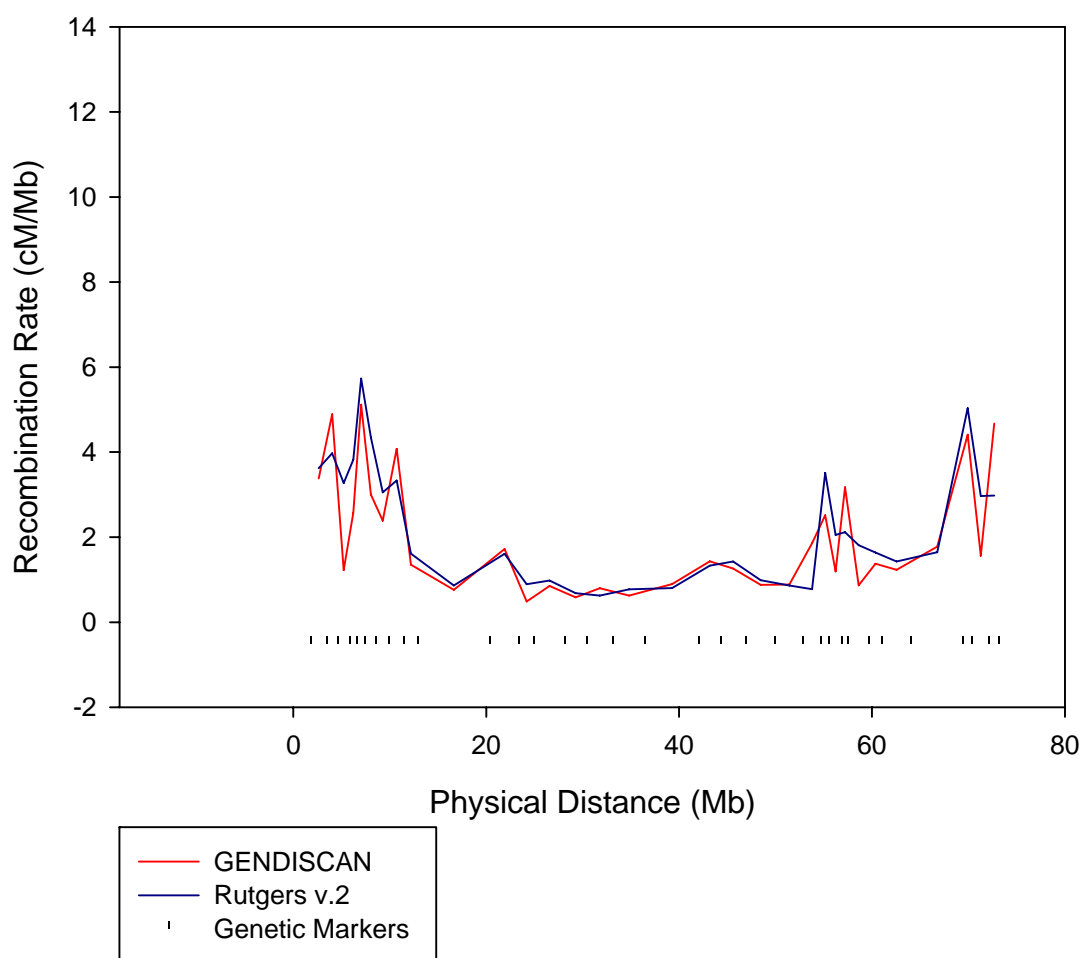

# Chromosome 19

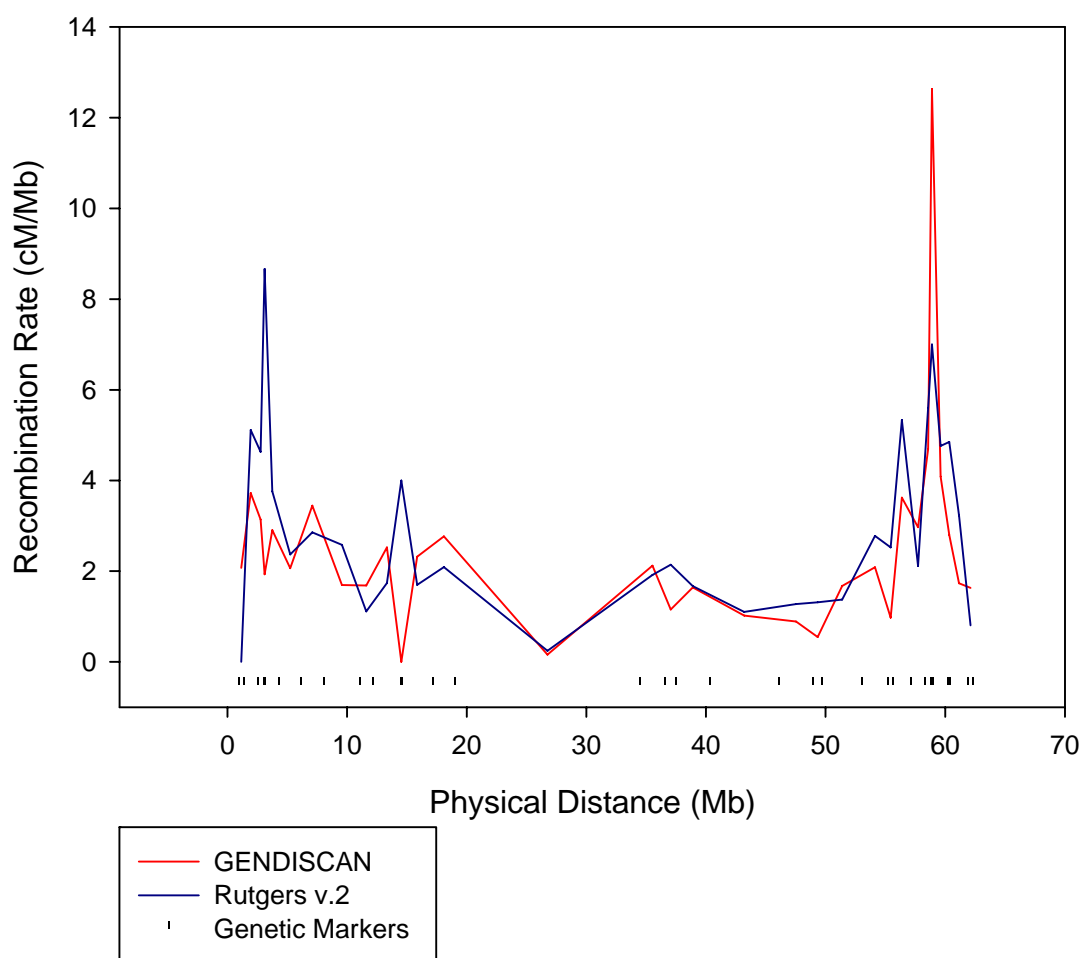

# Chromosome 20

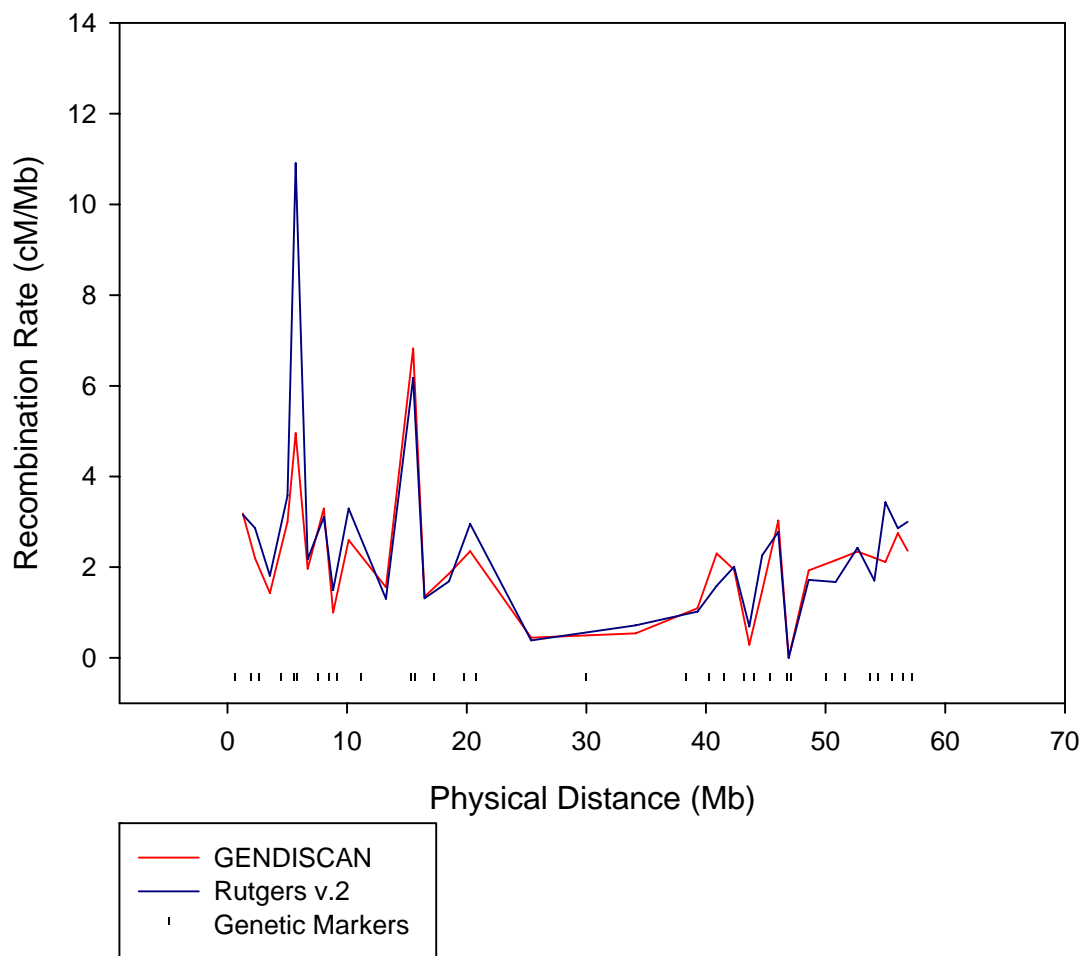

# Chromosome 21

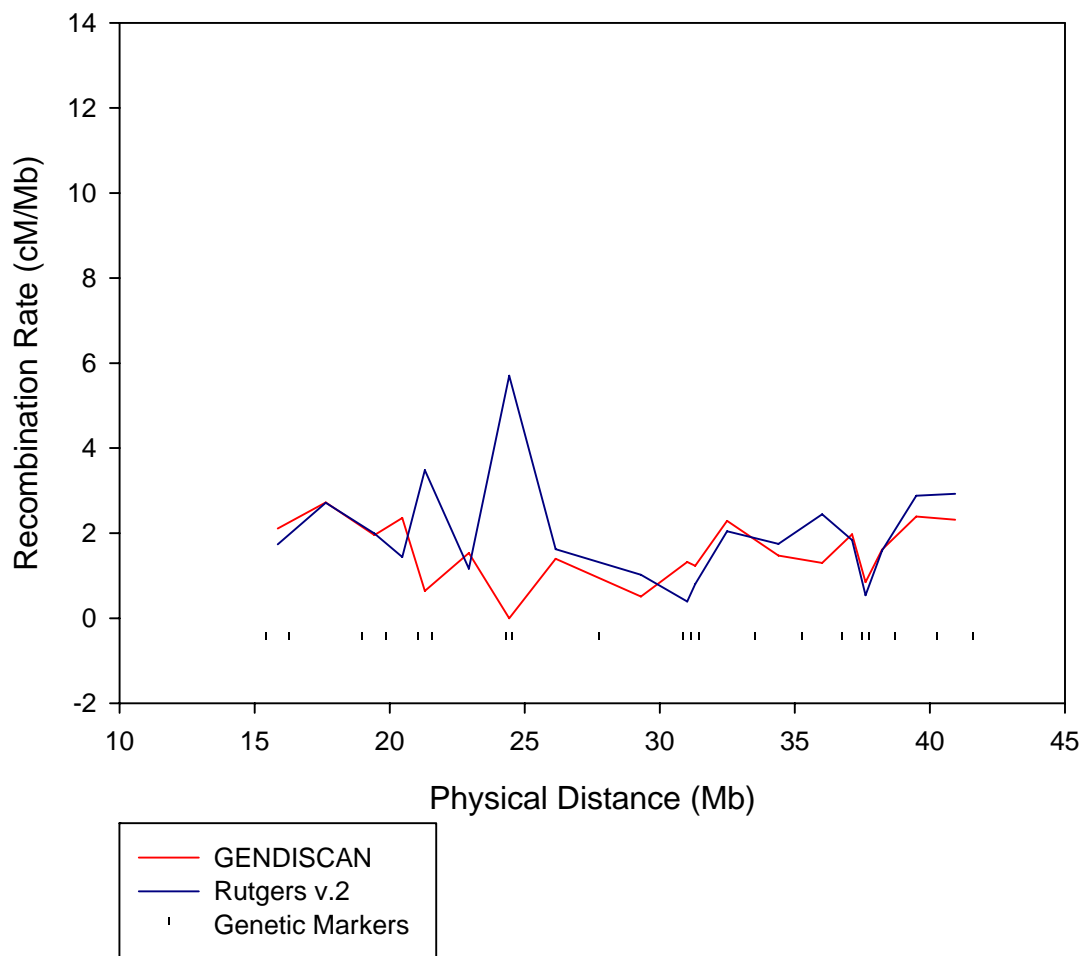

# Chromosome 22

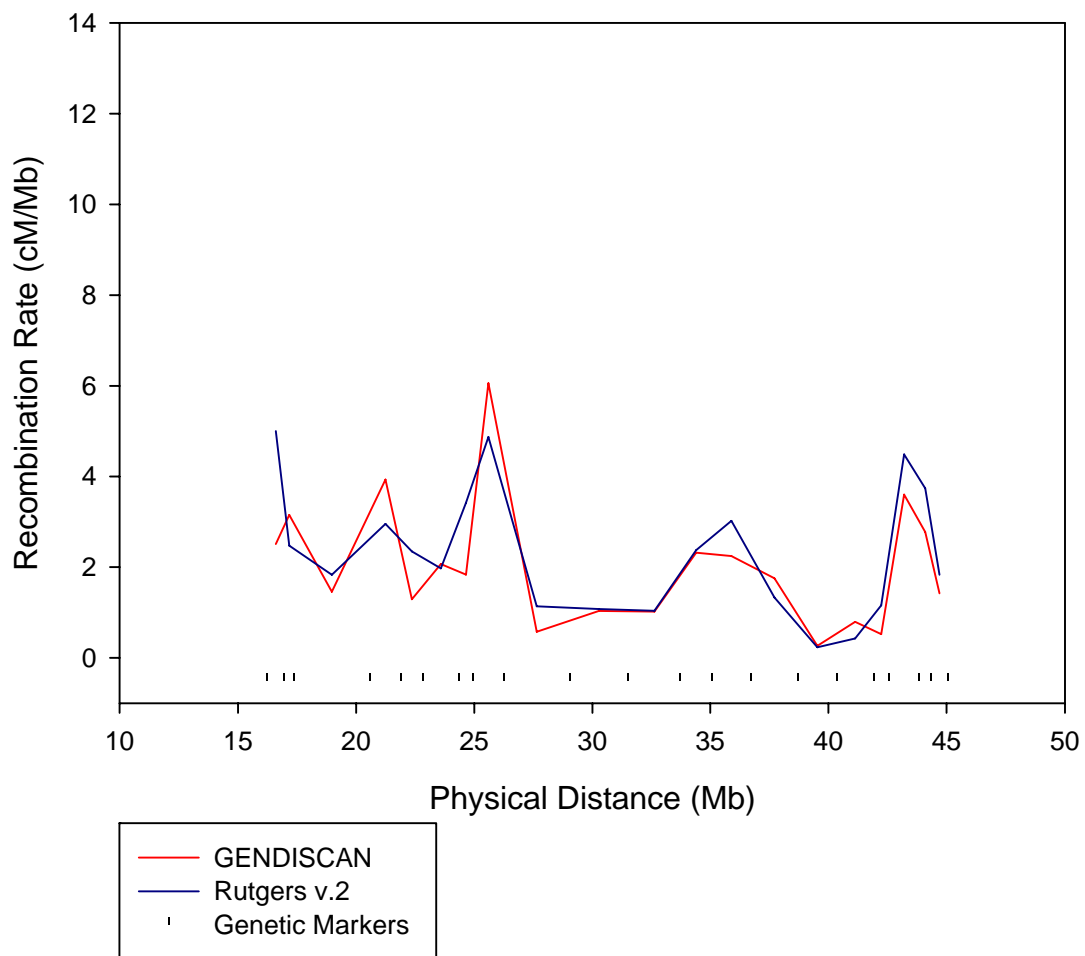

Supplement: 1471-2164-9-554-S2.pdf [file 1471-2164-9-554-S2.pdf]
